# Supplementary material for: Small-Sized Mg–Al LDH Nanosheets Supported on Silica Aerogel with Large Pore Channels: Textural Properties and Basic Catalytic Performance after Activation
Source: PubMed Central journal article supplement (PMC5853744; doi:10.3390/nano8020113), 2018-02-16
Supplement: nanomaterials-08-00113-s001.pdf [file nanomaterials-08-00113-s001.pdf]

Supporting Information

**Small-sized Mg-Al LDH nanosheets supported on silica aerogel with large pore channels: Textural properties and basic catalytic performance after activation**

Lijun Wang \*, Yusen Wang, Xiaoxia Wang, Xiaolan Feng, Xiao Ye, Jie Fu

*School of Chemistry and Chemical Engineering, Shaoxing University, Shaoxing 312000, PR China*

\*Corresponding author. E-mail address: [ljwang@usx.edu.cn](mailto:ljwang@usx.edu.cn)

**Figures and Tables**

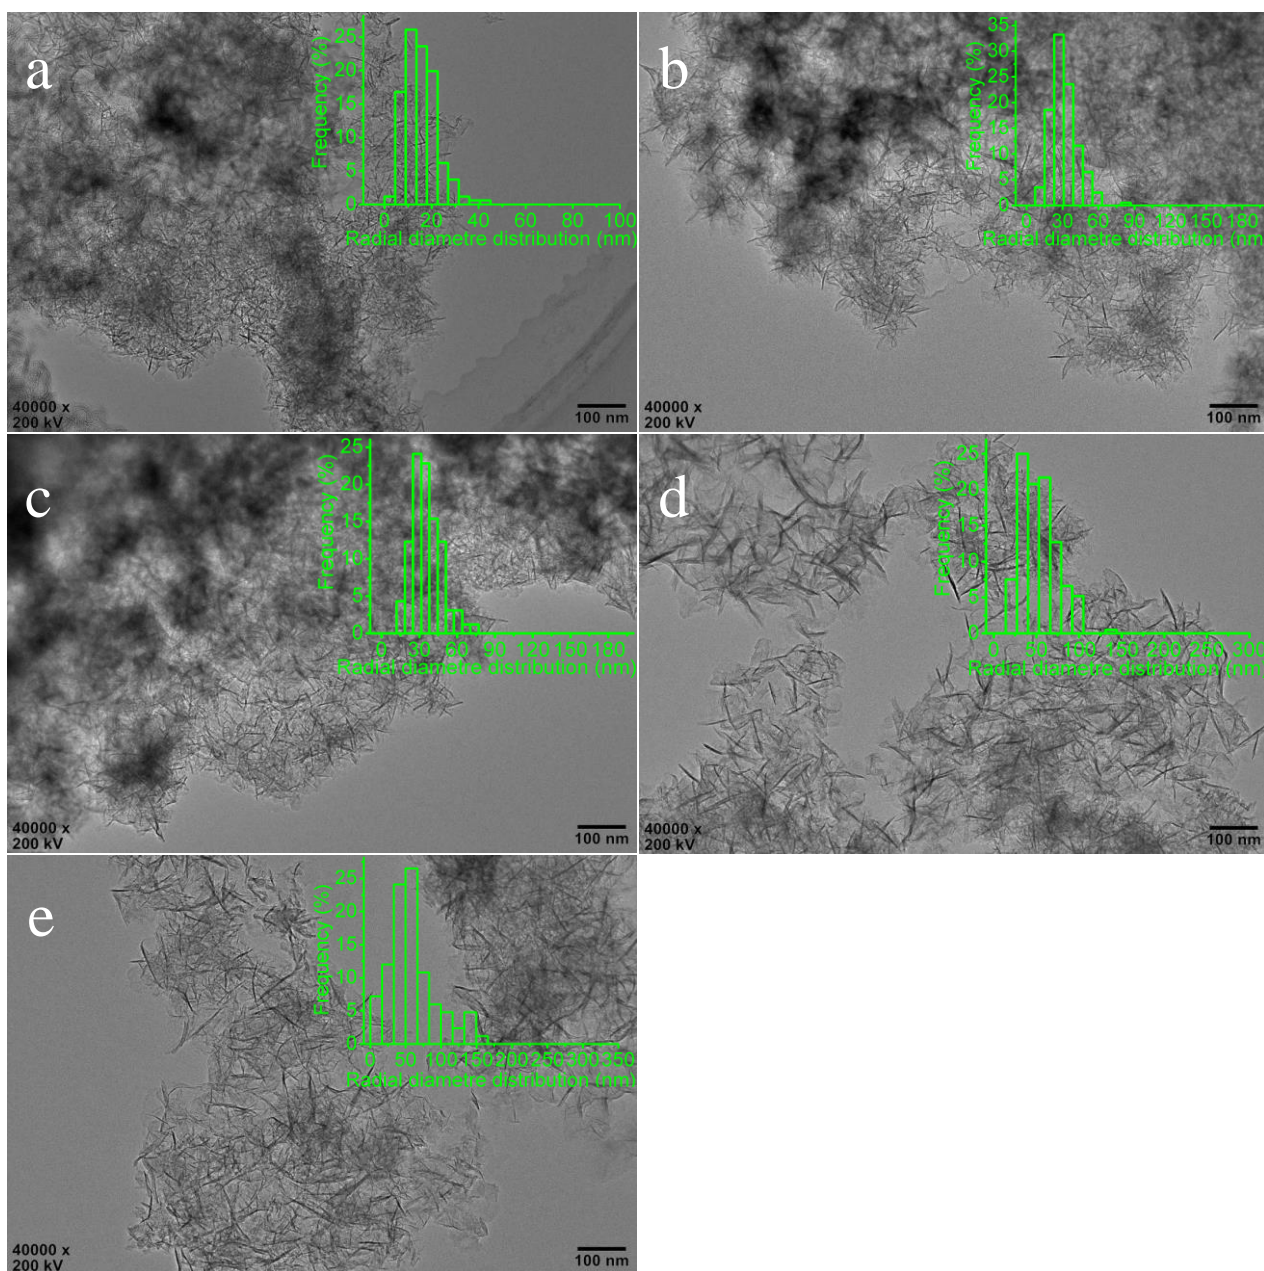

**Figure S1** TEM images of SA/LDH-Mg<sub>2</sub>Al-80 (a), SA/LDH-Mg<sub>5</sub>Al<sub>2</sub>-80 (b), SA/LDH-Mg<sub>3</sub>Al-80 (c), SA/LDH-Mg<sub>2</sub>Al-105 (d) and SA/LDH-Mg<sub>2</sub>Al-150 (e) with a large length-to-height ratio of 1.5; the insets are the radial diameter distributions of the supported LDH nanosheets acquired from >150 nanoparticles in the corresponding images.

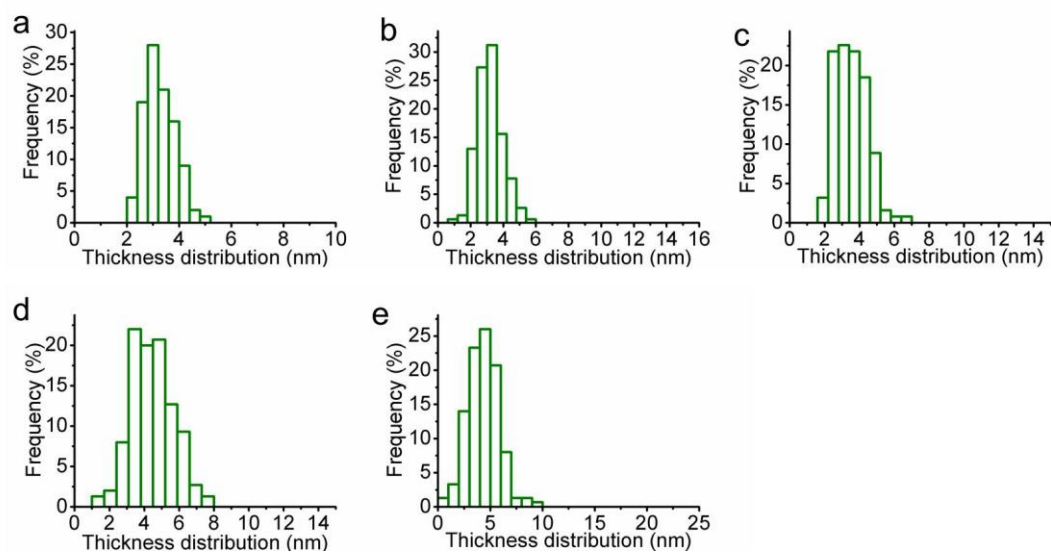

**Figure S2** Thickness distributions of the supported LDH nanosheets: SA/LDH-Mg<sub>2</sub>Al-80 (a), SA/LDH-Mg<sub>5</sub>Al<sub>2</sub>-80 (b), SA/LDH-Mg<sub>3</sub>Al-80 (c), SA/LDH-Mg<sub>2</sub>Al-105 (d) and SA/LDH-Mg<sub>2</sub>Al-150 (e) acquired from >150 nanoparticles in Figure S1.

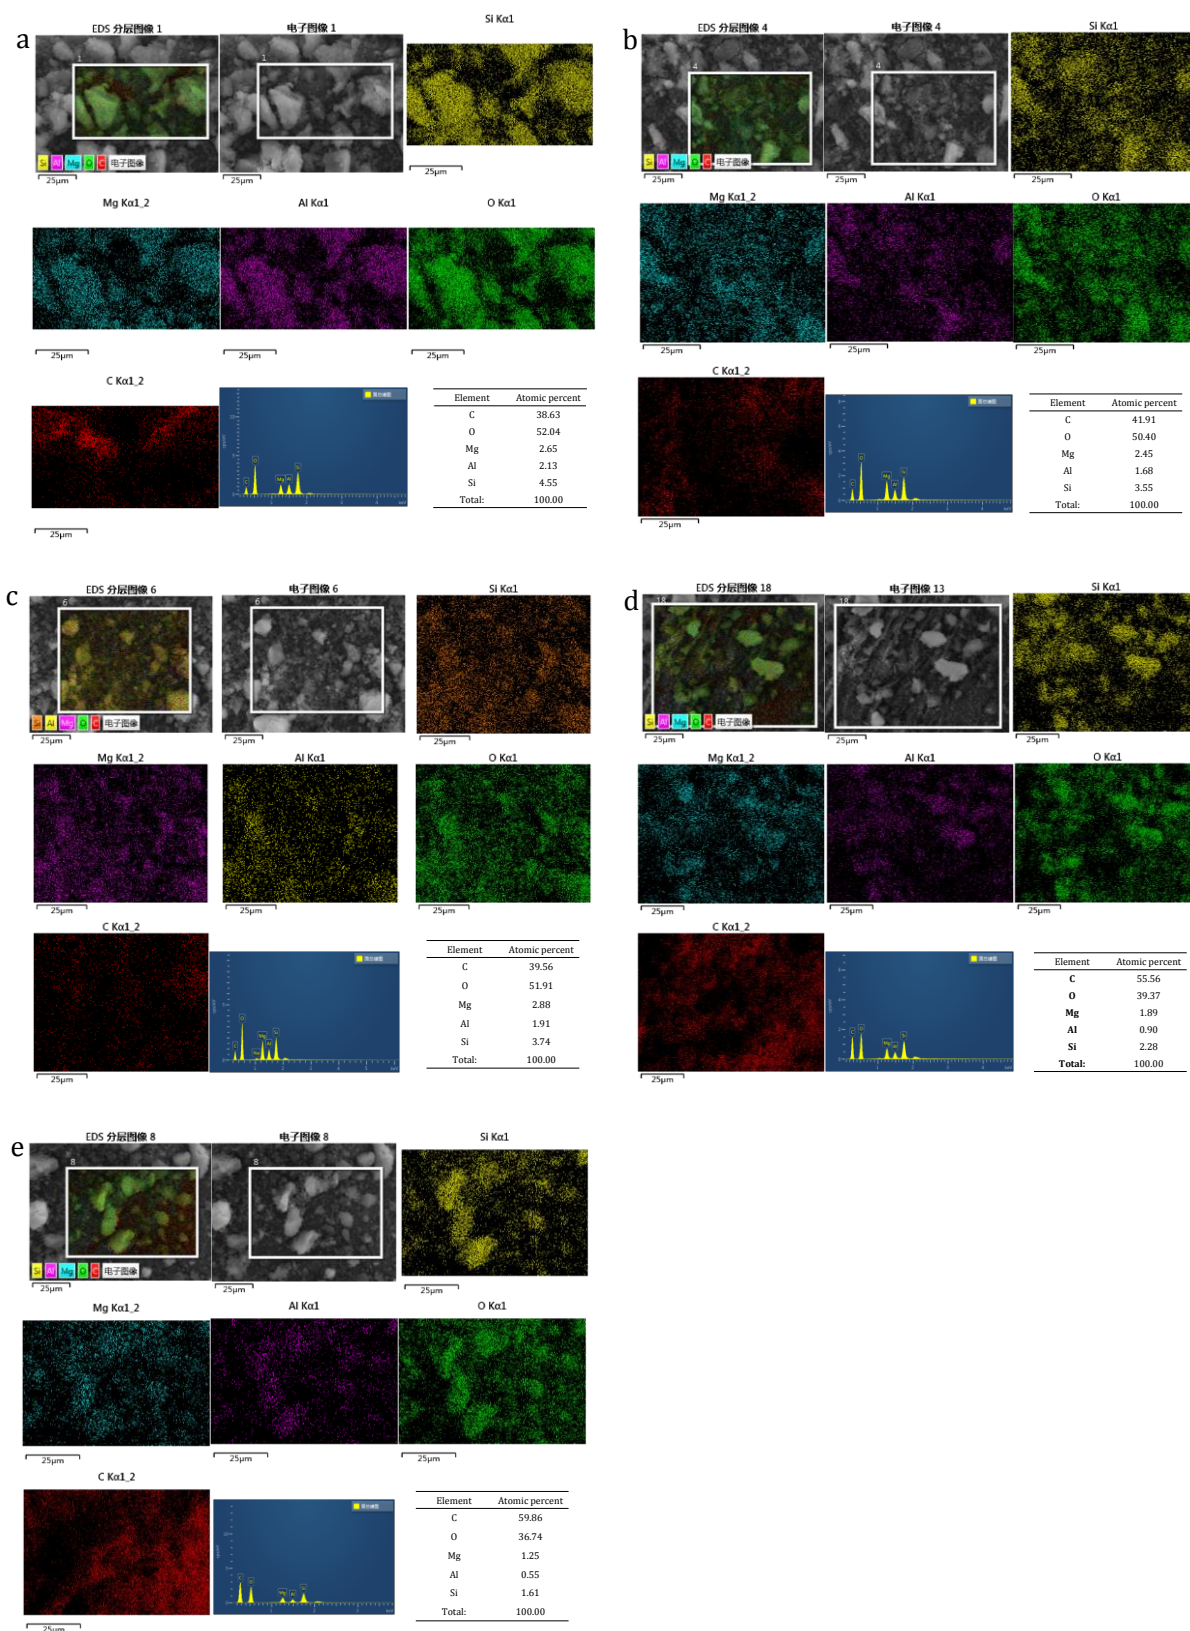

**Figure S3** EDS mappings and corresponding elemental analysis of SA/LDH-Mg<sub>2</sub>Al-80 (a), SA/LDH-Mg<sub>2</sub>Al-105 (b), SA/LDH-Mg<sub>2</sub>Al-150 (c), SA/LDH-Mg<sub>5</sub>Al<sub>2</sub>-80 (d) and SA/LDH-Mg<sub>3</sub>Al-80 (e).

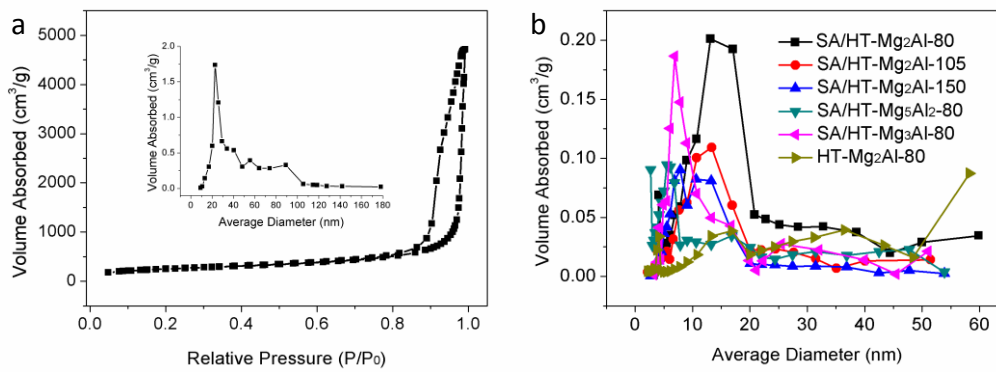

**Figure S4** (a)  $N_2$  adsorption–desorption isotherms and the corresponding BJH pore size distribution (inset) of SA; (b) BJH pore size distributions of the SA/LDH series and the unsupported LDH (LDH- $Mg_2Al-80$ ).

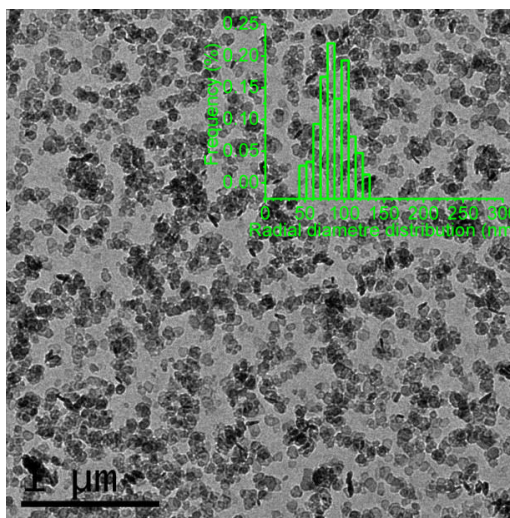

**Figure S5** TEM image of unsupported LDH nanosheets (LDH- $Mg_2Al-80$ ) using as a contrast sample. The inset is the corresponding radial diameter distribution.

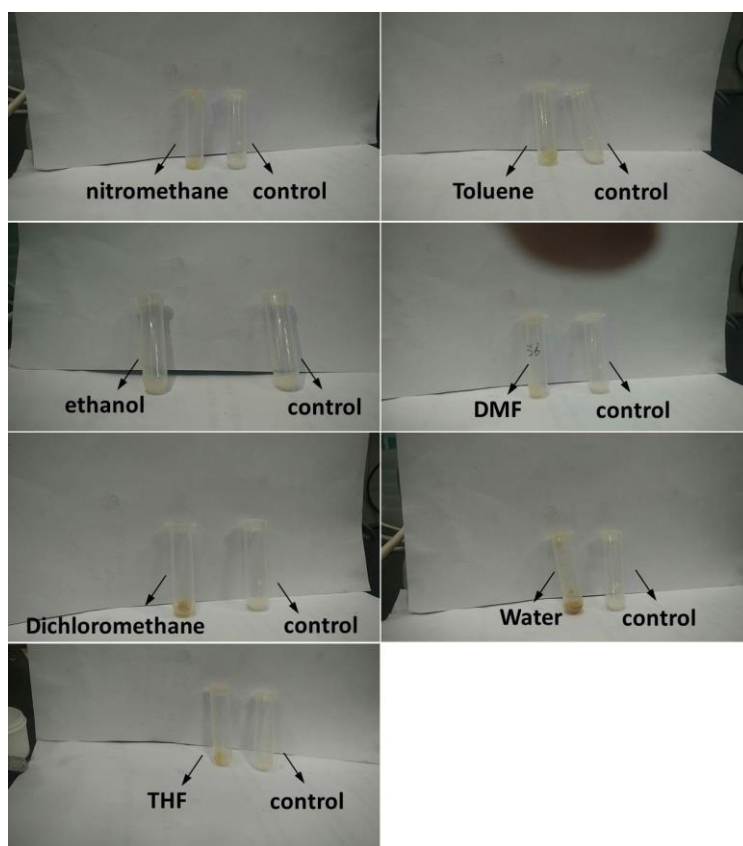

**Figure S6** The used catalyst SA/LDH-Mg<sub>2</sub>Al-80 collected by centrifugation after the reaction of benzaldehyde with nitromethane in different solvents such as nitromethane, ethanol, dichloromethane, toluene, DMF, Water and THF.

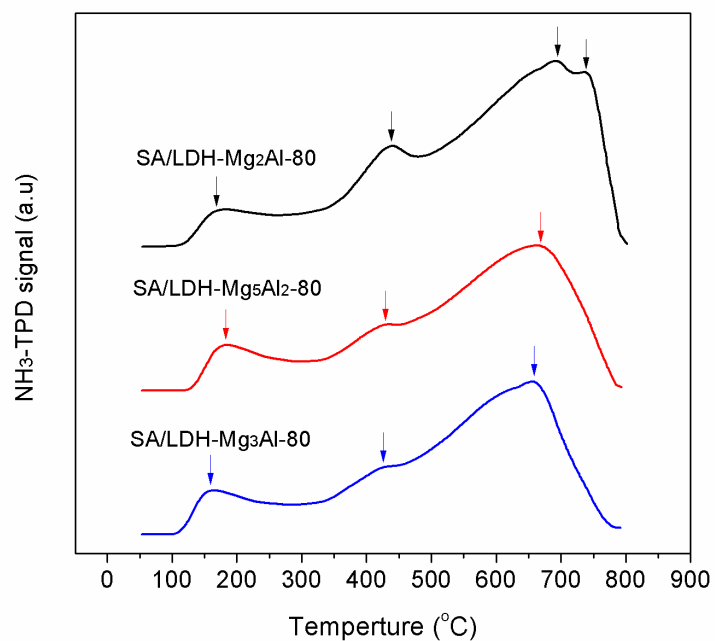

**Figure S7** NH<sub>3</sub>-TPD profiles of SA/LDH series synthesized at a temperature of 80°C.

**Table S1** The semi-quantitative results of NH<sub>3</sub>-TPD measurements. <sup>a</sup>

| Samples                                    | NH <sub>3</sub> -TPD peak position (°C) |       |             | Total peak area (a.u.) <sup>a</sup> |
|--------------------------------------------|-----------------------------------------|-------|-------------|-------------------------------------|
|                                            | I                                       | II    | III         |                                     |
| SA/LDH-Mg <sub>2</sub> Al-80               | 168.0                                   | 440.0 | 695.5/736.4 | 99705.9                             |
| SA/LDH-Mg <sub>5</sub> Al <sub>2</sub> -80 | 183.6                                   | 431.8 | 667.8       | 80575.0                             |
| SA/LDH-Mg <sub>3</sub> Al-80               | 161.0                                   | 429.1 | 660.6       | 83856.0                             |

<sup>a</sup> Total peak area is linearly proportional to the amount of NH<sub>3</sub> adsorbed.
